# Supplementary material for: Improved synthesis and physicochemical characterization of the selective serotonin 2A receptor agonist 25CN-NBOH
Source: publisher site journal article supplement (doi:10.3762/bjoc.22.11), 2026-01-22
Supplement: Additional file 1 [file 1860-5397-22-11-S1.pdf]

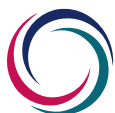

## Supporting Information

for

### Improved synthesis and physicochemical characterization of the selective serotonin 2A receptor agonist 25CN-NBOH

Adrian G. Rossebø, Hannah G. Kolberg, Anders E. Tønder, Louise Kjaerulff, Poul Erik Hansen, Karla A. Frydenvang, Jesper Østergaard and Jesper L. Kristensen

*Beilstein J. Org. Chem.* **2026**, 22, 175–184. doi:10.3762/bjoc.22.11

### Further details on SCXRD, deuterium isotope effects, and NMR spectra

# Single-crystal X-ray diffraction (SCXRD)

Positions of all nonhydrogen atoms were located by direct methods (SHELXT) [1]. Full-matrix least-squares refinements (SHELXL) [2] were performed on  $F^2$ , minimizing  $\sum w(F_o^2 - kF_c^2)^2$ . The position and anisotropic displacement parameters of the nonhydrogen atoms were refined. Hydrogen atoms were observed in subsequent difference electron density maps, and the hydrogen atoms were included in calculated position with fixed isotropic displacement parameters ( $U_{\text{iso}} = 1.2 U_{\text{eq}}$  for CH, CH<sub>2</sub> and  $U_{\text{iso}} = 1.5 U_{\text{eq}}$  for CH<sub>3</sub>), except for hydrogen atoms connected to O or N atoms. For these hydrogen atoms, the position was refined with fixed isotropic displacement parameters ( $U_{\text{iso}} = 1.2 U_{\text{eq}}$  for NH<sub>2</sub>;  $U_{\text{iso}} = 1.5 U_{\text{eq}}$  for OH).

Refinement (228 parameters, 4864 unique reflections) converged at  $R_F = 0.0401$ ,  $wR_F^2 = 0.0933$  (4238 reflections with  $F_o > 4 \sigma(F_o)$ ,  $w^{-1} = (\sigma^2(F_o^2) + (0.0379 P)^2 + 0.3263 P)$ , where  $P = (F_o^2 + 2 F_c^2)/3$ ,  $S = 1.042$ ). The residual electron density varied between  $-0.29$  and  $0.41 \text{ e}\cdot\text{\AA}^{-3}$ . Complex scattering factors for neutral atoms were taken from International Tables for Crystallography [3] as incorporated in SHELXL. The structure refinement details are summarized in the table below.

**Table S1:** SCXRD crystal data, data collection, and refinement data for **1·HCl**.

|                                                               |                                                                                                                                                         |
|---------------------------------------------------------------|---------------------------------------------------------------------------------------------------------------------------------------------------------|
| Formula                                                       | C <sub>18</sub> H <sub>20</sub> N <sub>2</sub> O <sub>3</sub> ; HCl                                                                                     |
| Mw (g/mol)                                                    | 348.82                                                                                                                                                  |
| Temperature (K)                                               | 100(1)                                                                                                                                                  |
| Crystal class                                                 | triclinic                                                                                                                                               |
| Space group                                                   | <i>P</i> -1                                                                                                                                             |
| Cell parameters                                               | <i>a</i> = 7.9797(9) Å<br><i>b</i> = 9.0829(12) Å<br><i>c</i> = 12.723(2) Å<br>$\alpha$ = 102.530(6)°<br>$\beta$ = 101.278(5)°<br>$\gamma$ = 97.587(5)° |
| <i>V</i> (Å <sup>3</sup> ), <i>Z</i>                          | 868.0(2) / 2                                                                                                                                            |
| <i>F</i> (000)                                                | 368                                                                                                                                                     |
| <i>d</i> <sub>calc</sub> (g/cm <sup>3</sup> )                 | 1.335                                                                                                                                                   |
| $\lambda$                                                     | 0.71073 Å (MoK $\alpha$ )                                                                                                                               |
| $\theta_{\text{max}}$ (°)                                     | 2.34 < $\theta$ < 29.58                                                                                                                                 |
| Reflections total/unique                                      | 37669/4864                                                                                                                                              |
| <i>R</i> <sub>merge</sub>                                     | 0.0416                                                                                                                                                  |
| No. parameters/restraints                                     | 228/0                                                                                                                                                   |
| Reflections ( <i>I</i> > 2 $\sigma$ ( <i>I</i> ))             | 4238                                                                                                                                                    |
| <i>R</i> 1/ <i>wR</i> 2 ( <i>I</i> > 2 $\sigma$ ( <i>I</i> )) | 0.0338/0.0877                                                                                                                                           |
| <i>R</i> 1/ <i>wR</i> 2 (all reflections)                     | 0.0401/0.0933                                                                                                                                           |
| Goodness-of-fit on <i>F</i> <sup>2</sup>                      | 1.042                                                                                                                                                   |
| $\rho_{\text{max}}$ / $\rho_{\text{min}}$ (eÅ <sup>-3</sup> ) | 0.41 / -0.29                                                                                                                                            |

# Secondary deuterium isotope effects

## Predicted nuclear shielding and experimental chemical shift

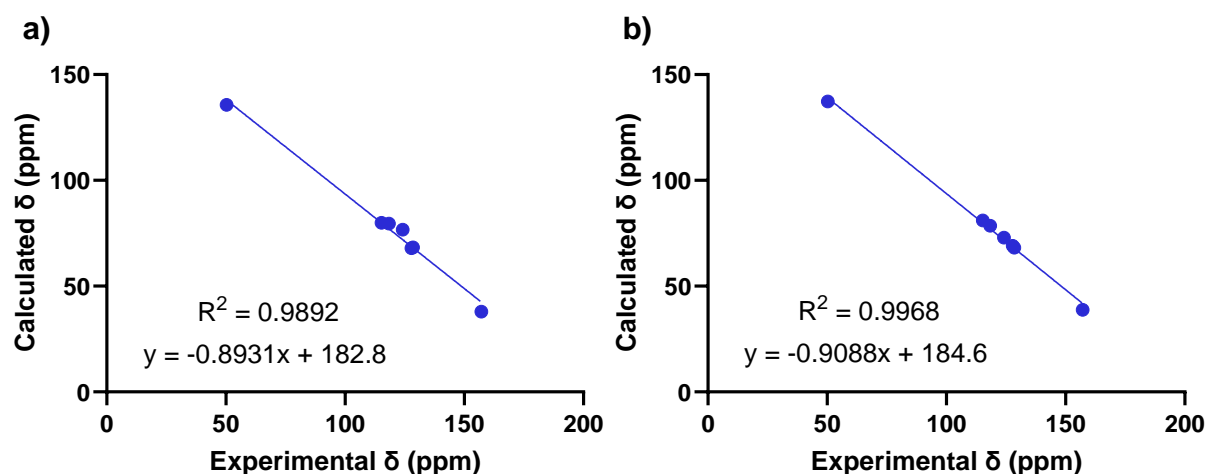

**Figure S1:** Plot of calculated  $^{13}\text{C}$  nuclear shielding vs experimental chemical shift. Calculated values a) in vacuum and b) with water molecules hydrogen-bonded and as implicit solvent. Although the difference is small, the fit is better in b), and the model is more physically correct.

## Predicted and experimental chemical shift changes

**Table S2:** Predicted and experimental deuterium isotope effects on the  $^{13}\text{C}$  chemical shift (in ppm). a) The OH hydrogen atom is simulated as deuterium by shortening the O–H bond length. b) The NH hydrogen atom is simulated as deuterium by shortening the N–H bond length. c) Sum of  $\Delta\delta_{\text{calc}}$  (OH) and  $\Delta\delta_{\text{calc}}$  (NH).

| Carbon no. | $\Delta\delta_{\text{calc}}(\text{OH})^{\text{a}}$ | $\Delta\delta_{\text{calc}}(\text{NH})^{\text{b}}$ | $\Delta\delta_{\text{calc}}^{\text{c}}$ | $\Delta\delta_{\text{exp}}$ |
|------------|----------------------------------------------------|----------------------------------------------------|-----------------------------------------|-----------------------------|
| C11        | -0.09                                              | 0.12                                               | 0.03                                    | 0.05                        |
| C12        | -0.05                                              | 0.12                                               | 0.07                                    | 0.09                        |
| C13        | -0.21                                              | 0.03                                               | -0.18                                   | -0.07                       |
| C14        | 0.25                                               | 0.01                                               | 0.26                                    | 0.21                        |
| C15        | -0.01                                              | 0                                                  | -0.01                                   | 0.08                        |
| C16        | -0.01                                              | -0.01                                              | -0.02                                   | 0.02                        |
| C17        | -0.15                                              | -0.01                                              | -0.16                                   | -0.07                       |
| C18        | -0.06                                              | -0.01                                              | -0.07                                   | -0.02                       |

# NMR spectra

1-HCl:  $^1\text{H}$  NMR (600 MHz) and  $^{13}\text{C}$  NMR (151 MHz) in  $\text{DMSO-}d_6$

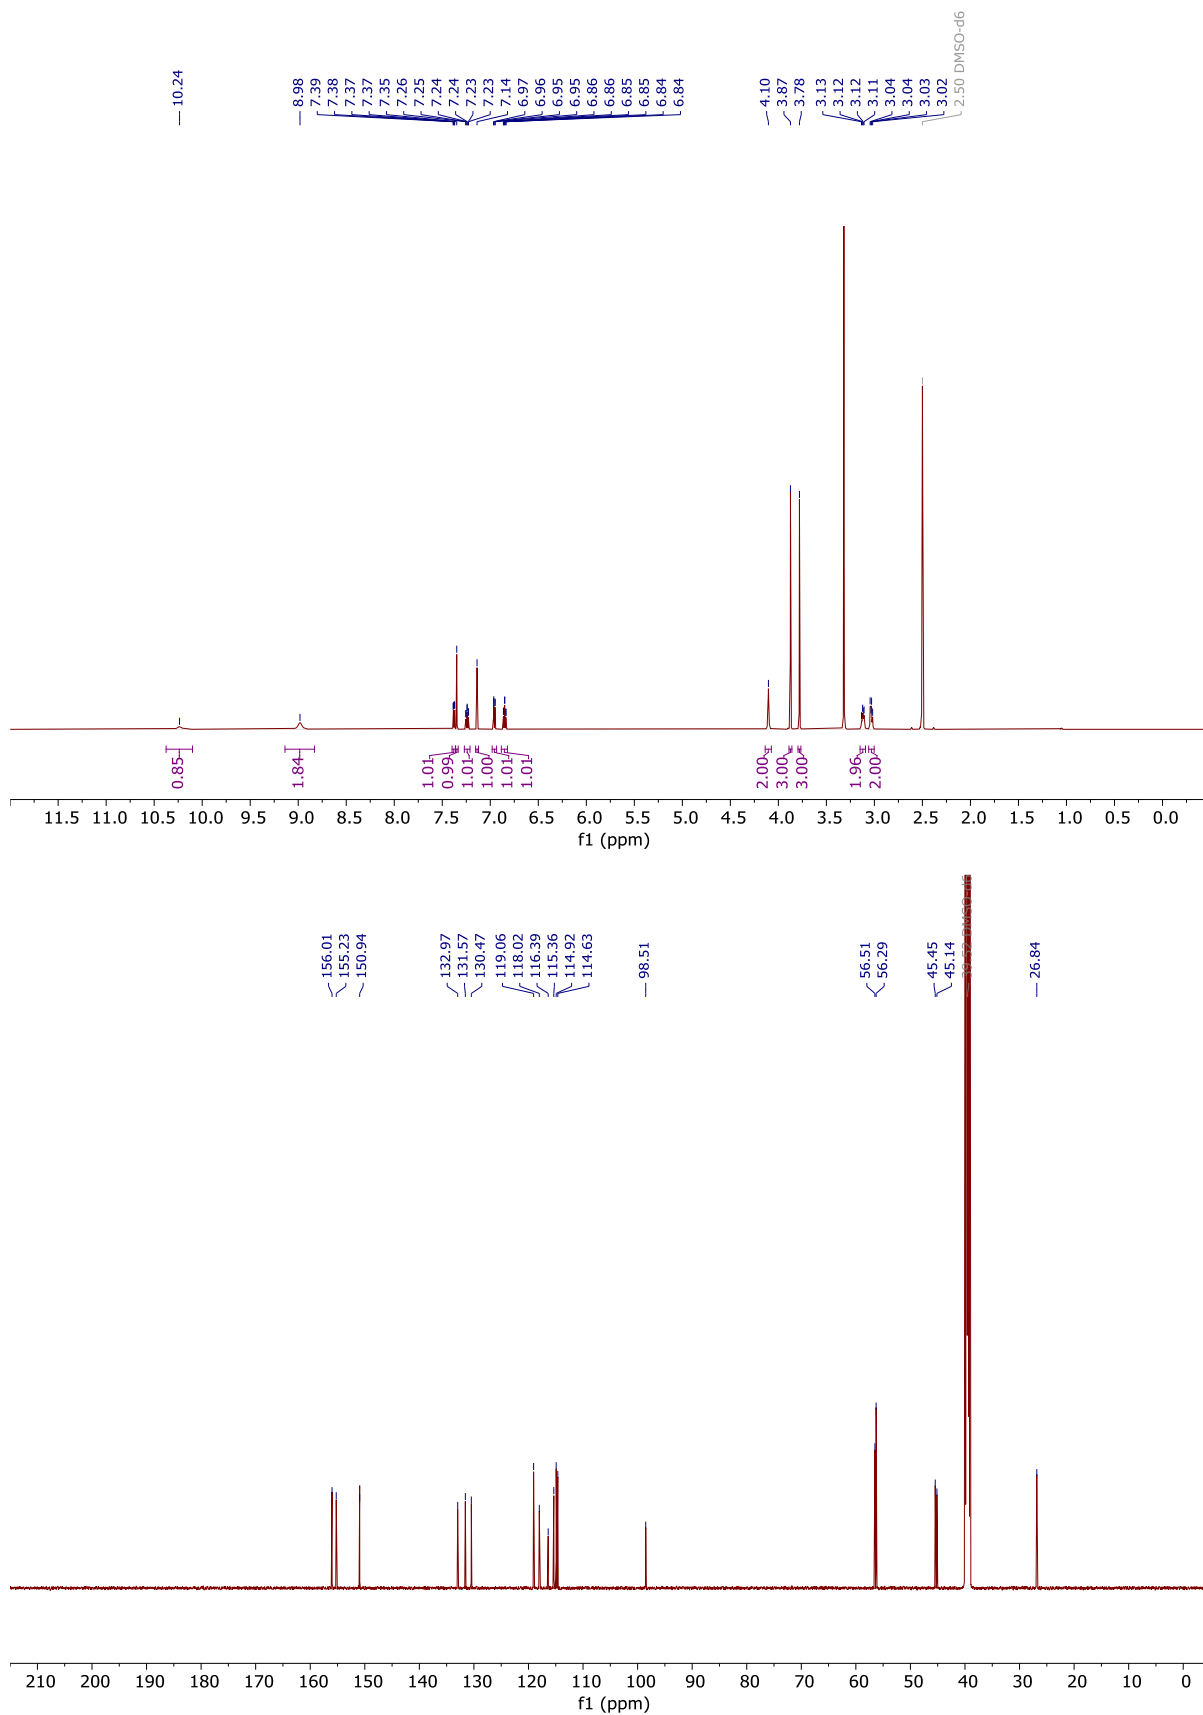

## References

- 1 G. M. Sheldrick, SHELXT – Integrated space-group and crystal-structure determination, *Acta Crystallogr. Sect. Found. Adv.*, 2015, **71**, 3–8.
- 2 G. M. Sheldrick, Crystal structure refinement with SHELXL, *Acta Crystallogr. Sect. C Struct. Chem.*, 2015, **71**, 3–8.
- 3 A. J. C. Wilson, *International Tables for Crystallography*, Kluwer Academic Publishers, Dordrecht, The Netherlands, 2006, vol. C.
